# Supplementary material for: Room temperature nanoarchitectonics of ultrafine SnO2 and Cu-doped SnO2 crystallites for advanced H2S sensing
Source: Royal Society of Chemistry journal article supplement (doi:10.1039/d4nj02669a), 2024-01-01
Supplement: d4nj02669a1.pdf [file d4nj02669a1.pdf]

**Electronic supplementary information (ESI)**

**Room temperature nanoarchitectonics of ultrafine SnO<sub>2</sub> and Cu doped SnO<sub>2</sub> crystallites for advanced H<sub>2</sub>S sensing**

Atom Rajiv Singh,<sup>a</sup> Manas Srivastava,<sup>a</sup> K. G. Girija<sup>1</sup>,<sup>a</sup> R. S. Ningthoujam<sup>a,b</sup> and A. K.

Tyagi<sup>a,b</sup>

<sup>a</sup>*Chemistry Division, Bhabha Atomic Research Centre, Mumbai 400085*

<sup>b</sup>*Homi Bhabha National Institute, Anushaktinagar, Mumbai 400094*

*Authors to whom correspondence should be addressed: [rsn@barc.gov.in](mailto:rsn@barc.gov.in) (R. S. Ningthoujam)*

*and [aktyagi@barc.gov.in](mailto:aktyagi@barc.gov.in) (A. K. Tyagi)*

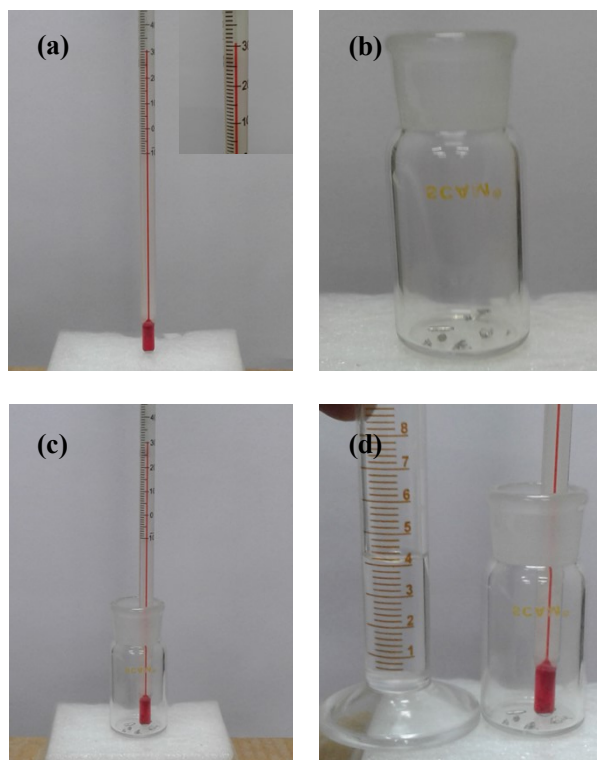

**Fig. S1** The experimental set up of 150 mg of Sn in 4 ml of concentrated  $\text{HNO}_3$  in a weighing bottle having 25 ml capacity.

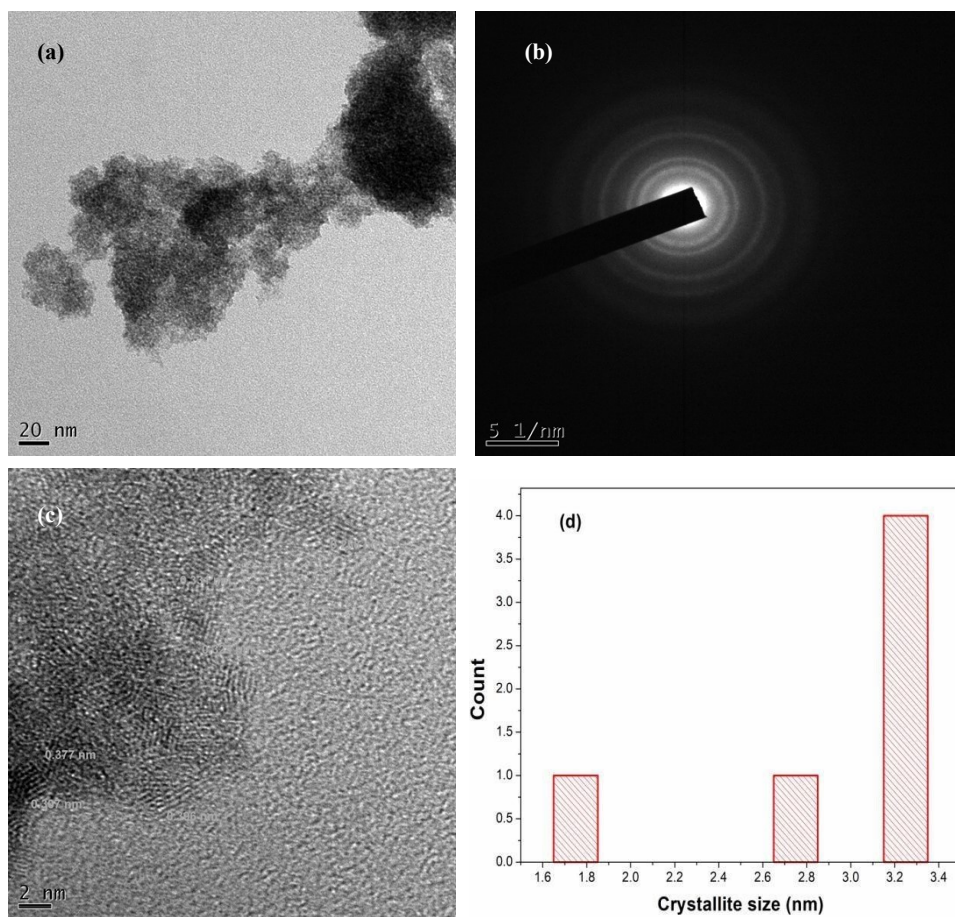

**Fig. S2** (a) TEM image of sample SnO<sub>2</sub>:3Cu, (b) SAED pattern, (c) HRTEM, and (d) Crystallite size (nm) distribution.
